# Supplementary material for: Using Weighted Hospital Service Area Networks to Explore Variation in Preventable Hospitalization
Source: PubMed Central journal article supplement (PMC6056604; doi:10.1111/1475-6773.12777), 2017-09-22
Supplement: HESR-53-3148-s002.pdf [file HESR-53-3148-s002.pdf]

## Table S1

### Codes for identifying preventable hospitalizations

| Category                                     | ICD-10-AM diagnosis and procedure codes                                                                                                                                                                                                                                                                                                                                                                                                                                                                                                                                                                                                                                                                                                                                                                                              |
|----------------------------------------------|--------------------------------------------------------------------------------------------------------------------------------------------------------------------------------------------------------------------------------------------------------------------------------------------------------------------------------------------------------------------------------------------------------------------------------------------------------------------------------------------------------------------------------------------------------------------------------------------------------------------------------------------------------------------------------------------------------------------------------------------------------------------------------------------------------------------------------------|
| <b>Chronic</b>                               |                                                                                                                                                                                                                                                                                                                                                                                                                                                                                                                                                                                                                                                                                                                                                                                                                                      |
| Angina                                       | I20, I24.0, I24.8, I24.9 as principal diagnosis only, exclude cases with procedure codes not in blocks [1820] to [2016]                                                                                                                                                                                                                                                                                                                                                                                                                                                                                                                                                                                                                                                                                                              |
| Asthma                                       | J45, J46 as principal diagnosis only                                                                                                                                                                                                                                                                                                                                                                                                                                                                                                                                                                                                                                                                                                                                                                                                 |
| Chronic obstructive pulmonary disease (COPD) | J20, J41, J42, J43, J44, J47 as principal diagnosis only, J20 only with additional diagnoses of J41, J42, J43, J44, J47                                                                                                                                                                                                                                                                                                                                                                                                                                                                                                                                                                                                                                                                                                              |
| Congestive cardiac failure                   | I50, I11.0, J81 as principal diagnosis only, exclude cases with the following procedure codes: 33172-00, 35304-00, 35305-00, 35310-02, 35310-00, 38281-11, 38281-07, 38278-01, 38278-00, 38281-02, 38281-01, 38281-00, 38256-00, 38278-03, 38284-00, 38284-02, 38521-09, 38270-01, 38456-19, 38456-15, 38456-12, 38456-11, 38456-10, 38456-07, 38456-01, 38470-00, 38475-00, 38480-02, 38480-01, 38480-00, 38488-06, 38488-04, 38489-04, 38488-02, 38489-03, 38487-00, 38489-02, 38488-00, 38489-00, 38490-00, 38493-00, 38497-04, 38497-03, 38497-02, 38497-01, 38497-00, 38500-00, 38503-00, 38505-00, 38521-04, 38606-00, 38612-00, 38615-00, 38653-00, 38700-02, 38700-00, 38739-00, 38742-02, 38742-00, 38745-00, 38751-02, 38751-00, 38757-02, 38757-01, 38757-00, 90204-00, 90205-00, 90219-00, 90224-00, 90214-00, 90214-02. |
| Diabetes complications                       | E10–E14.9 as principal diagnoses, and E10–E14.9 as additional diagnoses where the principal diagnosis was: hypersmolarity (E87.0), acidosis (E87.2), transient ischaemic attack (G45), nerve disorders and neuropathies (G50–G64), cataracts and lens disorders (H25–H28), retinal disorders (H30–H36), glaucoma (H40–H42), myocardial infarction (I21–I22), other coronary heart diseases (I20, I23–I25), heart failure (I50), stroke and sequelae (I60–I64, I69.0–I69.4), peripheral vascular disease (I70–I74), gingivitis and periodontal disease (K05), kidney diseases including end-stage renal disease (N00–N29), and renal dialysis (Z49)                                                                                                                                                                                   |
| Hypertension                                 | I10, I11.9 as principal diagnosis only, exclude cases with procedure codes according to the list of procedures excluded from the Congestive cardiac failure category above.                                                                                                                                                                                                                                                                                                                                                                                                                                                                                                                                                                                                                                                          |
| Iron deficiency anaemia                      | D50.1, D50.8, D50.9 as principal diagnosis only.                                                                                                                                                                                                                                                                                                                                                                                                                                                                                                                                                                                                                                                                                                                                                                                     |
| Nutritional deficiencies                     | E40, E41, E42, E43, E55.0, E64.3 as principal diagnosis only.                                                                                                                                                                                                                                                                                                                                                                                                                                                                                                                                                                                                                                                                                                                                                                        |
| Rheumatic heart disease                      | I00 to I09 as principal diagnosis only. (Note: includes acute rheumatic fever)                                                                                                                                                                                                                                                                                                                                                                                                                                                                                                                                                                                                                                                                                                                                                       |
| <b>Acute</b>                                 |                                                                                                                                                                                                                                                                                                                                                                                                                                                                                                                                                                                                                                                                                                                                                                                                                                      |
| Appendicitis with generalised peritonitis    | K35.0 in any diagnosis field                                                                                                                                                                                                                                                                                                                                                                                                                                                                                                                                                                                                                                                                                                                                                                                                         |
| Cellulitis                                   | L03, L04, L08, L88, L98.0, L98.3 as principal diagnosis only, exclude cases with any procedure except those in blocks 1820 to 2016 or if procedure is 30216-02, 30676-00, 30223-02, 30064-00, 34527-01, 34527-00, 90661-00 and this is the only listed procedure                                                                                                                                                                                                                                                                                                                                                                                                                                                                                                                                                                     |
| Convulsions and epilepsy                     | G40, G41, O15, R56 as principal diagnosis only                                                                                                                                                                                                                                                                                                                                                                                                                                                                                                                                                                                                                                                                                                                                                                                       |
| Dehydration and gastroenteritis              | A09.9, E86, K52.2, K52.8, K52.9 as principal diagnosis only.                                                                                                                                                                                                                                                                                                                                                                                                                                                                                                                                                                                                                                                                                                                                                                         |
| Dental conditions                            | K02, K03, K04, K05, K06, K08, K09.8, K09.9, K12, K13 as principal diagnosis only.                                                                                                                                                                                                                                                                                                                                                                                                                                                                                                                                                                                                                                                                                                                                                    |
| Ear, nose and throat infections              | H66, H67, J02, J03, J06, J31.2 as principal diagnosis only.                                                                                                                                                                                                                                                                                                                                                                                                                                                                                                                                                                                                                                                                                                                                                                          |
| Gangrene                                     | R02 in any diagnosis field                                                                                                                                                                                                                                                                                                                                                                                                                                                                                                                                                                                                                                                                                                                                                                                                           |
| Pelvic inflammatory disease                  | N70, N73, N74 as principal diagnosis only.                                                                                                                                                                                                                                                                                                                                                                                                                                                                                                                                                                                                                                                                                                                                                                                           |
| Perforated/bleeding ulcer                    | K25.0, K25.1, K25.2, K25.4, K25.5, K25.6, K26.0, K26.1, K26.2, K26.4, K26.5, K26.6, K27.0, K27.1, K27.2, K27.4, K27.5, K27.6, K28.0, K28.1, K28.2, K28.4, K28.5, K28.6 as principal diagnosis only.                                                                                                                                                                                                                                                                                                                                                                                                                                                                                                                                                                                                                                  |
| Pyelonephritis                               | N10, N11, N12, N13.6, N39.0 as principal diagnosis only.                                                                                                                                                                                                                                                                                                                                                                                                                                                                                                                                                                                                                                                                                                                                                                             |
| <b>Vaccine-preventable</b>                   |                                                                                                                                                                                                                                                                                                                                                                                                                                                                                                                                                                                                                                                                                                                                                                                                                                      |
| Influenza and pneumonia                      | J10, J11, J13, J14, J15.3, J15.4, J15.7, J15.9, J16.8, J18.1, J18.8 in any diagnosis field, excludes cases with additional diagnosis of D57 (sickle-cell disorders) and people under 2 months                                                                                                                                                                                                                                                                                                                                                                                                                                                                                                                                                                                                                                        |
| Other vaccine-preventable conditions         | A35, A36, A37, A80, B05, B06, B16.1, B16.9, B18.0, B18.1, B26, G00.0, M01.4 in any diagnosis field                                                                                                                                                                                                                                                                                                                                                                                                                                                                                                                                                                                                                                                                                                                                   |

Transfers and type change separations were considered continuation of the same episode of care.

**Table S2**

Incidence rate ratios (IRRs) from multilevel models with higher-level units as either hospitals in weighted hospital service area networks (weighted-HSAN) or hospital service areas (HSA).

|                                           | Weighted-HSAN model |               | HSA model |               |
|-------------------------------------------|---------------------|---------------|-----------|---------------|
|                                           | IRR                 | (95% CIs)     | IRR       | (95% CIs)     |
| Hospital bed occupancy (per 10% increase) |                     |               |           |               |
| Average across weighted-HSAN              | 1.01                | (0.96 - 1.07) | -         | -             |
| Primary hospital of HSA                   | -                   | -             | 1.00      | (0.96 - 1.04) |
| Age                                       |                     |               |           |               |
| 45-54 years                               | 1.00                | (ref)         | 1.00      | (ref)         |
| 55-64 years                               | 1.20                | (1.15 - 1.26) | 1.19      | (1.14 - 1.26) |
| 65-74 years                               | 1.68                | (1.60 - 1.77) | 1.66      | (1.57 - 1.76) |
| 75-84 years                               | 2.49                | (2.36 - 2.62) | 2.45      | (2.32 - 2.60) |
| 85+ years                                 | 3.29                | (3.09 - 3.50) | 3.23      | (3.02 - 3.46) |
| Gender                                    |                     |               |           |               |
| Male                                      | 1.00                | (ref)         | 1.00      | (ref)         |
| Female                                    | 0.71                | (0.69 - 0.73) | 0.70      | (0.69 - 0.72) |
| Highest education                         |                     |               |           |               |
| Did not complete high school              | 1.00                | (ref)         | 1.00      | (ref)         |
| High school or equivalent                 | 0.94                | (0.91 - 0.96) | 0.93      | (0.91 - 0.96) |
| University or higher                      | 0.87                | (0.83 - 0.91) | 0.86      | (0.82 - 0.90) |
| Unknown/missing                           | 1.13                | (1.06 - 1.20) | 1.13      | (1.06 - 1.20) |
| Partnership status                        |                     |               |           |               |
| Married or partnered                      | 1.00                | (ref)         | 1.00      | (ref)         |
| Single                                    | 1.18                | (1.13 - 1.24) | 1.17      | (1.12 - 1.23) |
| Widowed or separated                      | 1.16                | (1.13 - 1.19) | 1.16      | (1.13 - 1.19) |
| Unknown/missing                           | 1.26                | (1.11 - 1.43) | 1.26      | (1.11 - 1.43) |
| Household income                          |                     |               |           |               |
| <\$10,000                                 | 1.00                | (ref)         | 1.00      | (ref)         |
| \$10,000 - \$29,999                       | 0.88                | (0.85 - 0.92) | 0.88      | (0.85 - 0.92) |
| \$30,000 - \$49,999                       | 0.80                | (0.76 - 0.85) | 0.80      | (0.76 - 0.85) |
| \$50,000 - \$69,999                       | 0.75                | (0.70 - 0.81) | 0.75      | (0.70 - 0.80) |
| \$70,000 or more                          | 0.65                | (0.60 - 0.70) | 0.64      | (0.60 - 0.69) |
| Rather not say                            | 0.92                | (0.88 - 0.97) | 0.92      | (0.88 - 0.96) |
| Unknown/missing                           | 1.13                | (1.07 - 1.19) | 1.12      | (1.07 - 1.18) |
| Employment status                         |                     |               |           |               |
| Not working                               | 1.00                | (ref)         | 1.00      | (ref)         |
| Part time                                 | 0.81                | (0.77 - 0.85) | 0.81      | (0.77 - 0.85) |
| Full time                                 | 0.82                | (0.78 - 0.87) | 0.82      | (0.78 - 0.87) |
| Unknown/missing                           | 0.92                | (0.84 - 1.01) | 0.92      | (0.84 - 1.01) |
| Language spoken at home                   |                     |               |           |               |
| English only                              | 1.00                | (ref)         | 1.00      | (ref)         |
| Other                                     | 0.91                | (0.87 - 0.95) | 0.90      | (0.87 - 0.94) |
| Health insurance status                   |                     |               |           |               |
| None                                      | 1.00                | (ref)         | 1.00      | (ref)         |
| Private (extras)                          | 1.04                | (0.99 - 1.08) | 1.04      | (1.00 - 1.09) |
| Private (no extras)                       | 1.28                | (1.20 - 1.35) | 1.28      | (1.20 - 1.35) |
| DVA health care                           | 1.62                | (1.56 - 1.67) | 1.63      | (1.57 - 1.68) |
| Health care card                          | 1.51                | (1.46 - 1.57) | 1.52      | (1.46 - 1.58) |
| Number of people can depend on            |                     |               |           |               |
| 0 people                                  | 1.00                | (ref)         | 1.00      | (ref)         |
| 1-4 people                                | 1.07                | (1.02 - 1.13) | 1.07      | (1.02 - 1.12) |
| 5-10 people                               | 1.05                | (1.00 - 1.10) | 1.04      | (0.99 - 1.10) |
| 11+ people                                | 1.18                | (1.11 - 1.25) | 1.18      | (1.11 - 1.25) |
| Unknown/missing                           | 1.13                | (1.05 - 1.20) | 1.12      | (1.05 - 1.20) |

|                                            | Weighted-HSAN model |               | HSA model |               |
|--------------------------------------------|---------------------|---------------|-----------|---------------|
|                                            | IRR                 | (95% CIs)     | IRR       | (95% CIs)     |
| <b>Health behaviours <sup>a</sup></b>      |                     |               |           |               |
| No positive behaviours                     | 0.88                | (0.78 - 0.99) | 0.87      | (0.78 - 0.98) |
| 1 positive behaviour                       | 1.00                | (ref)         | 1.00      | (ref)         |
| 2 positive behaviours                      | 0.88                | (0.84 - 0.91) | 0.87      | (0.84 - 0.91) |
| 3 positive behaviours                      | 0.77                | (0.74 - 0.80) | 0.76      | (0.73 - 0.80) |
| 4 positive behaviours                      | 0.75                | (0.71 - 0.79) | 0.75      | (0.71 - 0.79) |
| <b>Body Mass Index</b>                     |                     |               |           |               |
| Underweight                                | 1.14                | (1.10 - 1.19) | 1.14      | (1.09 - 1.19) |
| Healthy weight                             | 1.00                | (ref)         | 1.00      | (ref)         |
| Overweight                                 | 0.94                | (0.91 - 0.97) | 0.94      | (0.91 - 0.97) |
| Obese                                      | 1.00                | (0.96 - 1.03) | 1.00      | (0.96 - 1.03) |
| Unknown/missing                            | 1.22                | (1.10 - 1.34) | 1.22      | (1.10 - 1.34) |
| <b>Self-rated health</b>                   |                     |               |           |               |
| Excellent                                  | 1.00                | (ref)         | 1.00      | (ref)         |
| Very good                                  | 1.23                | (1.13 - 1.33) | 1.22      | (1.14 - 1.31) |
| Good                                       | 1.64                | (1.51 - 1.78) | 1.63      | (1.52 - 1.75) |
| Fair                                       | 2.64                | (2.42 - 2.88) | 2.62      | (2.43 - 2.82) |
| Poor                                       | 4.18                | (3.81 - 4.60) | 4.15      | (3.81 - 4.51) |
| Unknown/missing                            | 2.35                | (2.13 - 2.58) | 2.33      | (2.14 - 2.54) |
| <b>Number of morbidities <sup>b</sup></b>  |                     |               |           |               |
| None                                       | 1.00                | (ref)         | 1.00      | (ref)         |
| 1 morbidity                                | 1.33                | (1.28 - 1.38) | 1.33      | (1.28 - 1.38) |
| 2 morbidities                              | 2.01                | (1.93 - 2.09) | 2.01      | (1.93 - 2.09) |
| 3+ morbidities                             | 2.74                | (2.62 - 2.86) | 2.74      | (2.63 - 2.86) |
| <b>Functional limitations <sup>c</sup></b> |                     |               |           |               |
| No limitation                              | 1.00                | (ref)         | 1.00      | (ref)         |
| Minor limitation                           | 1.02                | (0.95 - 1.09) | 1.02      | (0.95 - 1.09) |
| Mild limitation                            | 1.24                | (1.17 - 1.32) | 1.24      | (1.17 - 1.32) |
| Moderate limitation                        | 1.55                | (1.46 - 1.65) | 1.55      | (1.47 - 1.64) |
| Severe limitation                          | 2.35                | (2.21 - 2.50) | 2.36      | (2.22 - 2.50) |
| Unknown/missing                            | 1.70                | (1.60 - 1.81) | 1.70      | (1.60 - 1.81) |
| <b>Psychological distress <sup>d</sup></b> |                     |               |           |               |
| Low distress                               | 1.00                | (ref)         | 1.00      | (ref)         |
| Moderate distress                          | 1.02                | (0.98 - 1.05) | 1.02      | (0.98 - 1.05) |
| High distress                              | 0.95                | (0.91 - 1.00) | 0.95      | (0.90 - 1.00) |
| Very high distress                         | 0.99                | (0.93 - 1.05) | 0.98      | (0.92 - 1.05) |
| Unknown/missing                            | 1.12                | (1.06 - 1.19) | 1.12      | (1.06 - 1.19) |
| <b>Variance</b>                            |                     |               |           |               |
| Weighted-HSAN / HSA (SE)                   | 0.132               | (0.032)       | 0.059     | (0.012)       |
| <b>Units of analysis</b>                   |                     |               |           |               |
| Level 1 (people)                           | 266,762             | -             | 266,762   | -             |
| Level 2 (hospitals/HSAs)                   | 79                  | -             | 72        | -             |

<sup>a</sup> Healthy behaviours, of non-smoking status, safe level of alcohol consumption (<14 drinks per week), at least 2.5 hours of intensity-weighted physical activity per week, and meeting dietary guidelines for daily fruit (2 serves) and vegetable (5 serves) consumption

<sup>b</sup> Of self-reported heart disease, high blood pressure, stroke, diabetes, blood clot, asthma, Parkinson's disease, and any cancer except skin cancer.

<sup>c</sup> Measured using the Medical Outcome Study physical functioning scale.

<sup>d</sup> Measured using the K10 scale.

**Table S3**

Demographic distribution of study participants and number of hospitalizations to major public hospitals.

|                     | Study population |        | Number of hospitalizations* |        |               |        |
|---------------------|------------------|--------|-----------------------------|--------|---------------|--------|
|                     | N                | % of N | All cause                   |        | 'Preventable' |        |
|                     |                  |        | n                           | % of N | N             | % of N |
| Total (N)           | 266,762          | 100    | 267,032                     | 100    | 26,728        | 100    |
| Age                 |                  |        |                             |        |               |        |
| 45-64               | 163,596          | 61.3   | 94,112                      | 35.2   | 7,651         | 28.6   |
| 65-84               | 94,913           | 35.6   | 154,959                     | 58.0   | 16,099        | 60.2   |
| 85+                 | 8,253            | 3.1    | 17,961                      | 6.7    | 2,978         | 11.1   |
| Sex                 |                  |        |                             |        |               |        |
| Male                | 123,740          | 46.4   | 148,985                     | 55.8   | 14,678        | 54.9   |
| Female              | 143,022          | 53.6   | 118,047                     | 44.2   | 12,050        | 45.1   |
| Multimorbidity†     |                  |        |                             |        |               |        |
| No conditions       | 108,978          | 40.9   | 54,567                      | 20.4   | 4,488         | 16.8   |
| 1 condition         | 93,358           | 35.0   | 88,140                      | 33.0   | 7,261         | 27.2   |
| 2 conditions        | 44,697           | 16.8   | 69,834                      | 26.2   | 7,905         | 29.6   |
| 3+ conditions       | 19,729           | 7.4    | 54,491                      | 20.4   | 7,074         | 26.5   |
| Self-rated health   |                  |        |                             |        |               |        |
| Excellent/very good | 133,871          | 50.2   | 58,636                      | 22.0   | 4,965         | 18.6   |
| Good                | 86,928           | 32.6   | 88,475                      | 33.1   | 8,467         | 31.7   |
| Fair / poor         | 36,552           | 13.7   | 103,923                     | 38.9   | 11,524        | 43.1   |
| Missing/unknown     | 9,411            | 3.5    | 15,998                      | 6.0    | 1,772         | 6.6    |

\* Hospitalizations to public hospitals, from participants' time of study entry (between 2006-2009) to death or end of linked data (end 2011), whichever came first (average of 3.7 years of follow-up).

† Self-reported conditions, of heart disease, high blood pressure, stroke, diabetes, blood clot, asthma, Parkinson's disease, and any cancer except skin cancer.

## Table S4

Reduction in deviance information criterion (DIC) statistic from a single-level age and sex adjusted model, structuring persons in various higher-level units and sequentially adjusting for (1) age and sex, (2) further personal socio-demographic and health characteristics, and (3) hospital bed occupancy.

| Higher-level unit(s) of multilevel model | DIC         |                                |                          |
|------------------------------------------|-------------|--------------------------------|--------------------------|
|                                          | Age and sex | + socio-demographic and health | + hospital bed occupancy |
| No random intercept                      | 0*          | 24,598                         | -                        |
| Weighted-HSAN                            | 2286        | 25,467                         | 25,468                   |
| HSA                                      | 2130        | 25,544                         | 25,542                   |
| SLA                                      | 4020        | 27,028                         | -                        |
| Both weighted-HSAN and SLA               | 4366        | 27,262                         | 27,262                   |
| Both HSA and SLA                         | 4287        | 27,254                         | 27,257                   |

\*referent category for reduction, DIC value of 185,452

## Table S5

Incidence rate ratio (IRR) for preventable hospitalization from a 10% increase in average hospital bed occupancy rate, from models\* with higher-level units as either hospitals in weighted hospital service area networks (weighted-HSAN) or hospital service areas (HSA), and statistical local areas (SLA).

| Higher-level unit(s) of multilevel model              | Incidence rate ratio |               |
|-------------------------------------------------------|----------------------|---------------|
|                                                       | IRR                  | (95% CIs)     |
| Weighted-hospital service area network (HSAN) †       | 1.01                 | (0.96 – 1.07) |
| Hospital service area (HSA) ‡                         | 1.00                 | (0.96 – 1.04) |
| Both weighted-HSAN and statistical local area (SLA) § | 0.98                 | (0.90 – 1.07) |
| Both HSA and SLA ¶                                    | 1.02                 | (0.96 – 1.08) |

\* Multilevel Poisson models, adjusted for socio-demographic and health characteristics of study participants.

† Two-level multiple membership multilevel model

‡ Two-level multilevel model

§ Three-level cross-classified multiple membership multilevel model

¶ Three-level cross-classified multilevel model

**Table S6**

Proportional change in between-hospital, HSA or SLA level variance after sequentially adjusting for (1) age and sex, (2) further personal socio-demographic and health characteristics, and (3) hospital bed occupancy.

| Higher-level unit(s) of multilevel model | Variance parameter (and SE of variance) |                                    |                              | Proportional change in variance parameter from prior model |       |       |
|------------------------------------------|-----------------------------------------|------------------------------------|------------------------------|------------------------------------------------------------|-------|-------|
|                                          | (1) Age and sex                         | (2) + socio-demographic and health | (3) + hospital bed occupancy | (1)                                                        | (2)   | (3)   |
| <b>Two level models</b>                  |                                         |                                    |                              |                                                            |       |       |
| Weighted-HSAN                            | 0.367 (0.084)                           | 0.130 (0.032)                      | 0.132 (0.032)                | -                                                          | 64.6% | -1.5% |
| HSA                                      | 0.105 (0.020)                           | 0.059 (0.012)                      | 0.059 (0.012)                | -                                                          | 43.8% | 0.0%  |
| SLA                                      | 0.325 (0.042)                           | 0.291 (0.039)                      | -                            | -                                                          | 10.5% | -     |
| <b>Three level models</b>                |                                         |                                    |                              |                                                            |       |       |
| Weighted-HSAN and SLA                    |                                         |                                    |                              |                                                            |       |       |
| Weighted-HSAN                            | 0.393 (0.096)                           | 0.234 (0.061)                      | 0.230 (0.062)                | -                                                          | 40.5% | 1.7%  |
| SLA                                      | 0.316 (0.046)                           | 0.270 (0.040)                      | 0.273 (0.041)                | -                                                          | 14.6% | -1.1% |
| HSA and SLA                              |                                         |                                    |                              |                                                            |       |       |
| HSA                                      | 0.091 (0.023)                           | 0.089 (0.022)                      | 0.091 (0.022)                | -                                                          | 2.2%  | -2.2% |
| SLA                                      | 0.282 (0.040)                           | 0.230 (0.033)                      | 0.231 (0.033)                | -                                                          | 18.4% | -0.4% |

# Figure S1

Correlation between hospital-level characteristics from patient populations constructed using a hospital service area (HSA) and weighted-hospital service area network (weighted-HSAN)

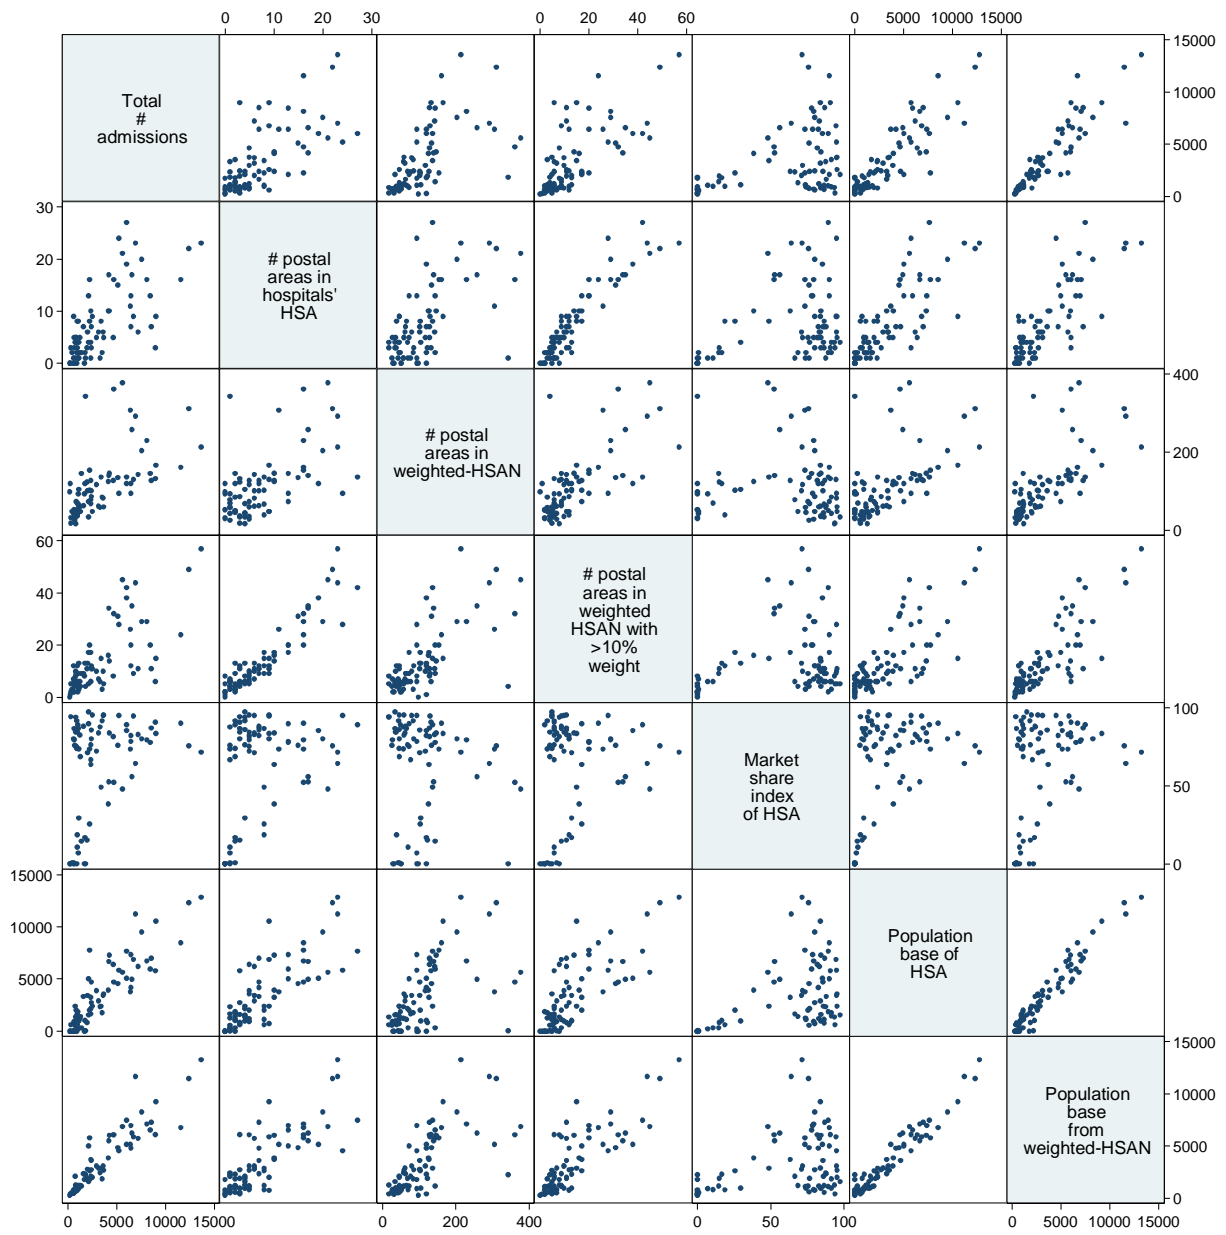



## Figure S2

Model specification of two-level multiple membership multilevel model, with persons structured within a weighted hospital service area network (weighted-HSAN), adjusted for personal socio-demographic and health characteristics, as well as average hospital bed occupancy rate (continuous variable, as a 10% increase).

$$Y_{ij} \sim \text{Poisson}(\pi_i)$$

$$\begin{aligned} \log(\pi_i) = & \text{offset}_i + \beta_0 + \beta_1 \text{age}(55 - 64) + \beta_2 \text{age}(65 - 74) + \beta_3 \text{age}(75 - 84) + \beta_4 \text{age}(84 +) \\ & + \beta_5 \text{gender}(\text{female}) + \beta_6 \text{education}(\text{high school}) + \beta_7 \text{education}(\text{university}) \\ & + \beta_8 \text{education}(\text{unknown}) + \beta_9 \text{partnership}(\text{single}) + \beta_{10} \text{partnership}(\text{separated}) \\ & + \beta_{11} \text{partnership}(\text{unknown}) + \beta_{12} \text{income}(\$10 - 29\text{k}) + \beta_{13} \text{income}(\$30 - 50\text{k}) \\ & + \beta_{14} \text{income}(\$50 - 70\text{k}) + \beta_{15} \text{income}(\$70\text{k} +) + \beta_{16} \text{income}(\text{not say}) \\ & + \beta_{17} \text{income}(\text{unknown}) + \beta_{18} \text{employment}(\text{part time}) + \beta_{19} \text{employment}(\text{full time}) \\ & + \beta_{20} \text{employment}(\text{unknown}) + \beta_{21} \text{language}(\text{other}) + \beta_{22} \text{insurance}(\text{private} - \text{extras}) \\ & + \beta_{23} \text{insurance}(\text{private}) + \beta_{24} \text{insurance}(\text{DVA}) + \beta_{25} \text{insurance}(\text{health care card}) \\ & + \beta_{26} \text{socialsupport}(1 - 4 \text{ people}) + \beta_{27} \text{socialsupport}(5 - 10 \text{ people}) \\ & + \beta_{28} \text{socialsupport}(11 + \text{ people}) + \beta_{29} \text{socialsupport}(\text{unknown}) \\ & + \beta_{30} \text{healthbehaviours}(1) + \beta_{31} \text{healthbehaviours}(2) + \beta_{32} \text{healthbehaviours}(3) \\ & + \beta_{33} \text{healthbehaviours}(4) + \beta_{34} \text{BMI}(\text{healthy}) + \beta_{35} \text{BMI}(\text{overweight}) + \beta_{36} \text{BMI}(\text{obese}) \\ & + \beta_{37} \text{BMI}(\text{unknown}) + \beta_{38} \text{health}(\text{verygood}) + \beta_{39} \text{health}(\text{good}) + \beta_{40} \text{health}(\text{fair}) \\ & + \beta_{41} \text{health}(\text{poor}) + \beta_{42} \text{health}(\text{missing}) + \beta_{43} \text{morbidity}(1) + \beta_{44} \text{morbidity}(2) \\ & + \beta_{45} \text{morbidity}(3 +) + \beta_{46} \text{limitations}(\text{minor}) + \beta_{47} \text{limitations}(\text{mild}) \\ & + \beta_{48} \text{limitations}(\text{moderate}) + \beta_{49} \text{limitations}(\text{severe}) + \beta_{50} \text{limitations}(\text{unknown}) \\ & + \beta_{51} \text{distress}(\text{moderate}) + \beta_{52} \text{distress}(\text{high}) + \beta_{53} \text{distress}(\text{veryhigh}) \\ & + \beta_{54} \text{distress}(\text{unknown}) + \beta_{55} \sum_{j=1}^{79} w_{j,i}^{(2)} \text{bedoccupancy}(10\% \text{ increase})^{(2)} \\ & + \sum_{j=1}^{79} w_{j,i}^{(2)} u_j^{(2)} \end{aligned}$$

Where  $u_j^{(2)} \sim N(0, \sigma_u^2)$

With hospital-level weights ( $0 \leq w_{j,i}^{(2)} \leq 1$ ) and ( $\sum_{j=1}^{79} w_{j,i}^{(2)} = 1$  for all  $i$ )

And  $\text{offset}_i$  is the logarithm of the follow-up time for individual  $i$ .
